# Supplementary material for: Predictors of Mental Health Service Use by Young Adults: A Systematic Review
Source: Atypon-hosted journal article supplement (doi:10.1176/appi.ps.201500280), 2016-04-15

**Supplemental Material**

Key terms used in the electronic database searches

|    | AND $\Rightarrow$      | AND $\Rightarrow$                  |
|----|------------------------|------------------------------------|
| OR | College students       | Community mental health service(s) |
| ↓  | Higher education       | Counseling                         |
|    | Undergraduate students | Counseling center(s)               |
|    | University students    | Counseling service(s)              |
|    | Young adults           | Health care seeking                |
|    |                        | Health service(s)                  |
|    |                        | Help-seeking                       |
|    |                        | Help seeking                       |
|    |                        | Help seeking behavior(u)r(s)       |
|    |                        | Mental health                      |
|    |                        | Mental health care                 |
|    |                        | Mental health service(s)           |
|    |                        | Mental health service use          |
|    |                        | Mental health service utilization  |
|    |                        | Mental health treatment            |
|    |                        | Professional psychological help    |
|    |                        | Psychiatry                         |
|    |                        | Psychiatric medication             |
|    |                        | Psychological service(s)           |
|    |                        | Psychopharmacology                 |
|    |                        | Psychotherapy                      |
|    |                        | Psychotropic                       |
|    |                        | Treatment utilization              |
|    |                        | University health service(s)       |

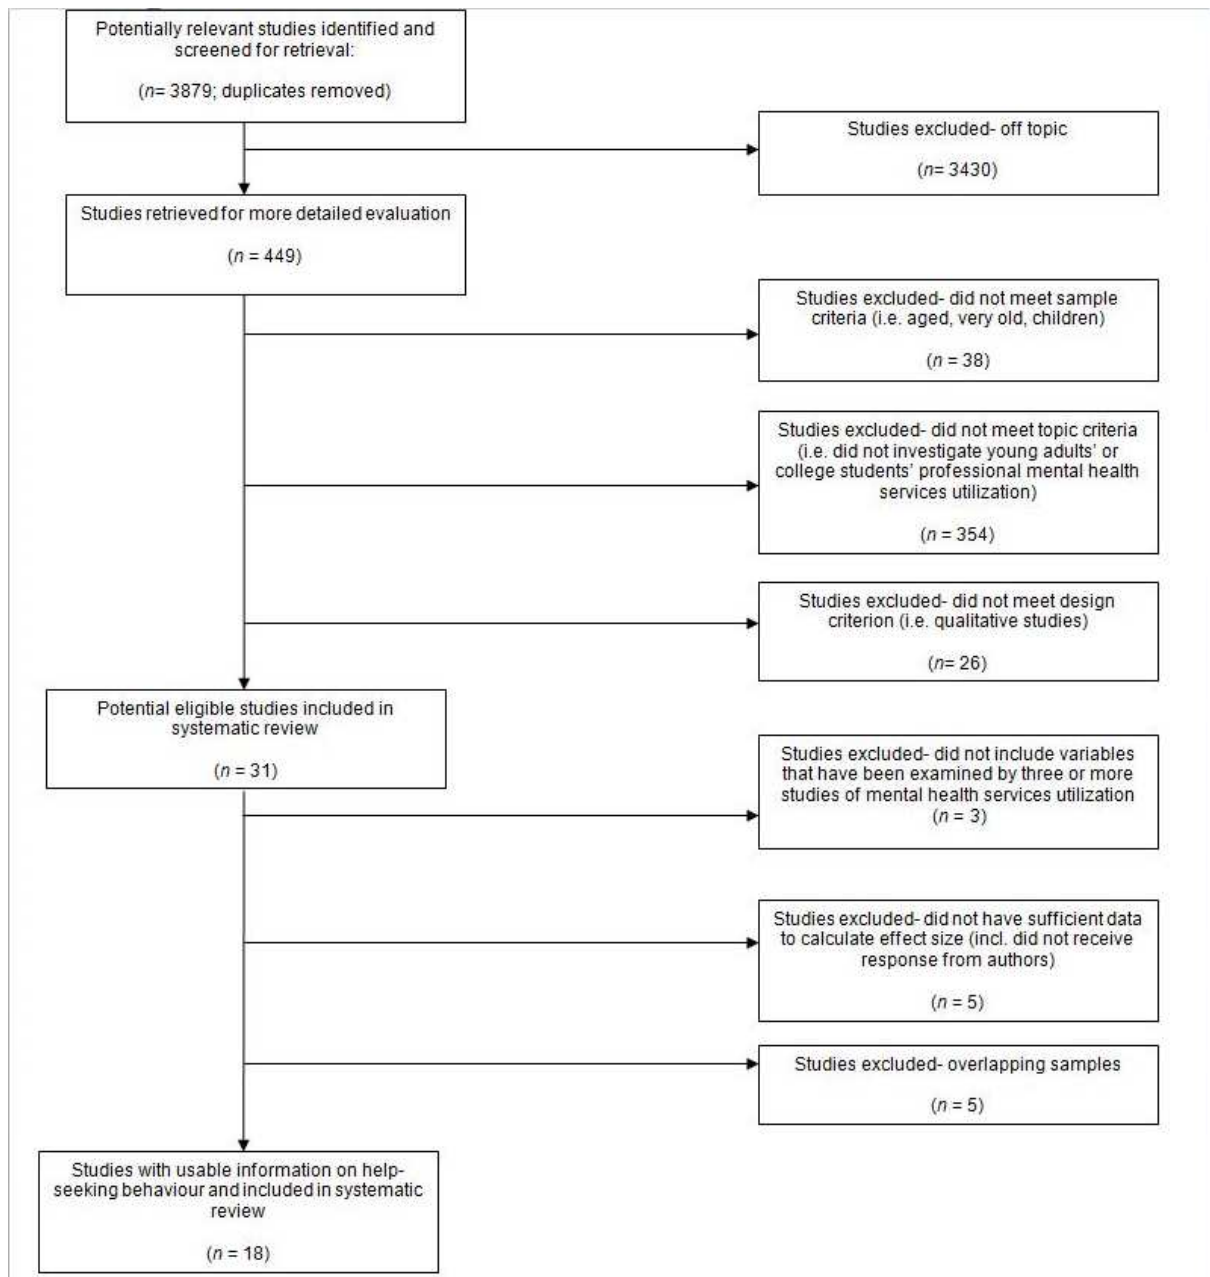

Supplement: appi.ps.201500280.ds001.pdf [file appi.ps.201500280.ds001.pdf]
